# Supplementary material
Source: Springer Nature journal article supplement (https://www.springermedizin.de/resource/supplementary/12913_2012_2298_MOESM1_ESM.pdf/9530178)
Supplement: MOESM1 [file 9530178]

**Researcher in direct  
contact with general  
practices  
Regions 1 & 2**

349 practices received  
notification of study

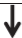

72 GP practices  
agree to take part,  
covering  
598,971 registered  
patients

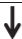

438 decedents identified

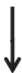

302 invitations sent to  
potential participants

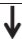

86 enquiries

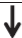

77 interviews

**Network staff act as  
gateway to general  
practices  
Region 3**

321 practices received  
notification of study

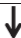

39 practices agree to  
take part. Unknown  
number of registered  
patients

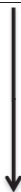

Unknown number of  
participants identified or  
invitations sent

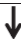

30 enquiries

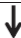

30 interviews
